# Supplementary material for: Trehalose Protects Maize Plants from Salt Stress and Phosphorus Deficiency
Source: Preprints.org preprint supplement (doi:10.20944/preprints201911.0358.v1), 2019-11-28
Supplement: Supplementary file 1 [file supplementary]

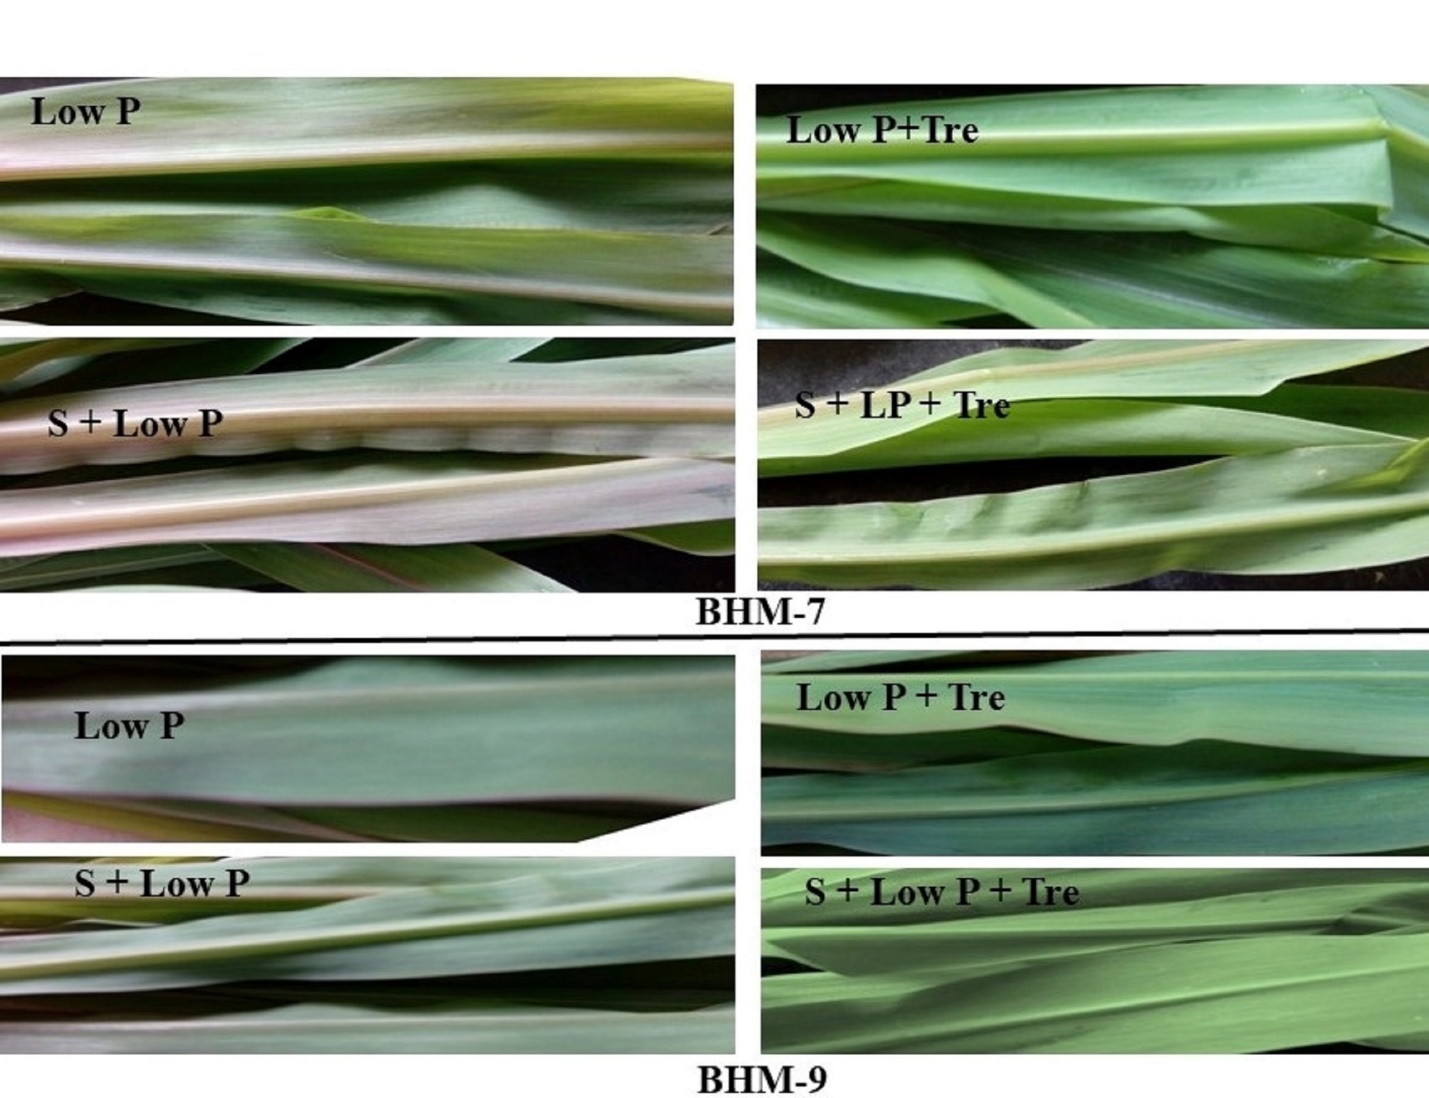


**Supplementary Fig. 1.** Effect Trehalose (Tre, 10 mM) on P deficiency symptom in maize seedlings of BHM-7 and BHM-9 under salinity (S, 150 mM) and low P (5 µM KH2PO4) stress. Seedlings were imposed stress for fifteen days
